# Supplementary material for: Single-cell RNA-sequencing analyses identify heterogeneity of CD8+ T cell subpopulations and novel therapy targets in melanoma
Source: PubMed Central journal article supplement — Mol Ther Oncolytics. 2020 Dec 15;20:105–18. doi: 10.1016/j.omto.2020.12.003 (PMC7851490; doi:10.1016/j.omto.2020.12.003), 2020-12-15
Supplement: mmc1.pdf [file mmc1.pdf]

OMTO, Volume 20

## **Supplemental Information**

### **Single-cell RNA-sequencing analyses identify heterogeneity of CD8<sup>+</sup> T cell subpopulations and novel therapy targets in melanoma**

**Weiwei Deng, Yubo Ma, Zhen Su, Yufang Liu, Panpan Liang, Chen Huang, Xiao Liu, Jin Shao, Yi Zhang, Kai Zhang, Jian Chen, and Ruoyu Li**

## Supplementary materials

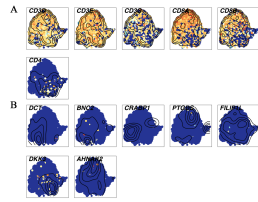

**Figure S1. t-SNE plots of marker genes were used to verify the accuracy of CD8<sup>+</sup> T cells.**

The single-cell transcript levels of T cell markers (*CD3D*, *CD3E*, *CD3G*), CD8<sup>+</sup> T cell markers (*CD8A*, *CD8B*), and CD4<sup>+</sup> T cell markers (*CD4*) (A). The single-cell transcript levels of melanocyte markers (*DCT*, *BNC2*, *CRABP1*, *PTGDS*, *FILIP1L*, *DKK3*, *AHNAK2*) (B).

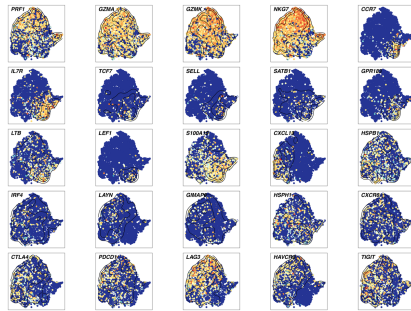

**Figure S2. Single-cell transcript levels of signature genes.**

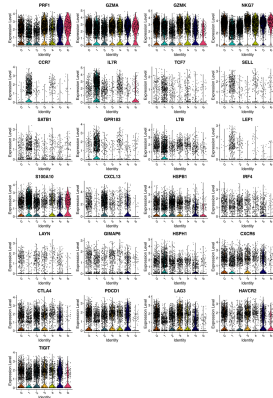

**Figure S3. Violin plots of signature genes across each subpopulation.**

Colors of violin plots correspond with annotated subpopulations in Figure 1(E-F).

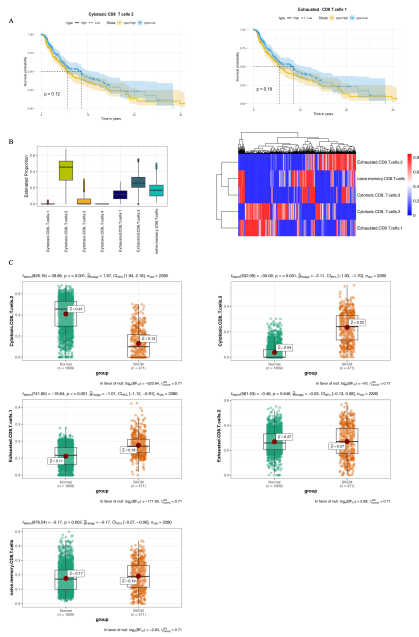

**Figure S4. Frequency of CD8<sup>+</sup> T cell subpopulations in normal samples.**

(A) No significant difference for cytotoxic subpopulation 2 and exhausted subpopulation 1 in SKCM prognoses. (B) Proportions of CD8<sup>+</sup> T cell subpopulations in normal samples. (C) Differential analysis of CD8<sup>+</sup> T cell subpopulations between SKCM and normal samples.

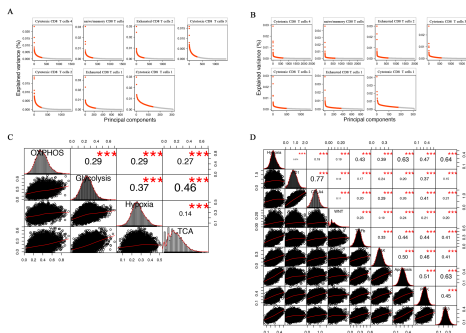

**Figure S5. The results of PCs variation and relationships between hypoxia and other pathways.**

(A-B) PCs variation from PCA based on metabolic gene transcript levels (A) and hallmark gene express levels. Red represented top 80% PCs variation. (C-D) The correlations between hypoxia and metabolic pathways (C), and the relationship between hypoxia and hallmark pathways (\* $p < 0.05$ ; \*\* $p < 0.01$ ; \*\*\* $p < 0.001$ ).

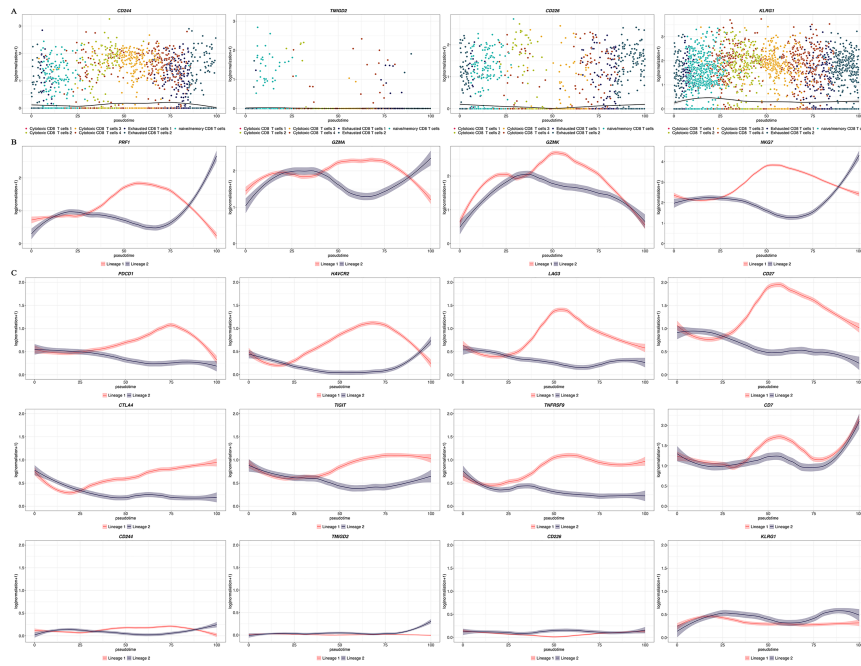

**Figure S6. Expression profiles of cytotoxic and immune checkpoint molecules.**

(A) Immune checkpoints without changes in lineage 1. (B-C) Transcript profiles of cytotoxic genes (B) and immune checkpoints (C) within lineage 1 and lineage 2.

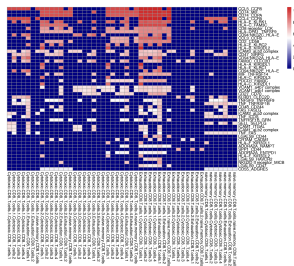

**Figure S7. A heatmap showed the distribution of ligand-receptor pairs among different subpopulations.**

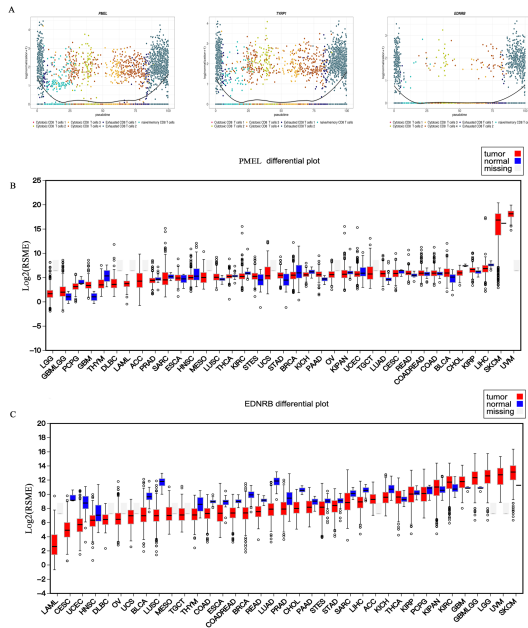

**Figure S8. Expression levels of *PMEL*, *TYRP1*, and *EDNRB*.**

(A) Transcript profiles of *PMEL*, *TYRP1*, and *EDNRB* in lineage 1. (B-C) The expression values of *PMEL* (B) and *EDNRB* (C) across 37 tumors and normal samples (download from FIREBROWSE database).

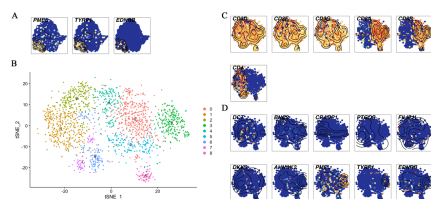

**Figure S9. Expression levels of *PMEL*, *TYRP1*, and *EDNRB* in single cells and different datasets.**

(A) Single-cell transcript levels of *PMEL*, *TYRP1*, and *EDNRB* ( $CD8^+$  T cells were classified by us). (B) The t-SNE plots for T cells. (C) The single-cell transcript levels of T cell markers (*CD3D*, *CD3E*, *CD3G*),  $CD8^+$  T cell markers (*CD8A*, *CD8B*), and  $CD4^+$  T cell markers (*CD4*). (D) The single-cell transcript levels of melanocyte markers (*DCT*, *BNC2*, *CRABP1*, *PTGDS*, *FILIP1L*, *DKK3*, *AHNAK2*) and the novel targets (*PMEL*, *TYRP1*, *EDNRB*). (B-D) T cells were classified by Tirosh et al., and we used the data to validate the expression levels of *PMEL*, *TYRP1*, and *EDNRB*.
